# Supplementary material for: Diet Quality and Incident Non-Communicable Disease in the 1946–1951 Cohort of the Australian Longitudinal Study on Women’s Health
Source: MDPI journal article supplement (doi:10.3390/ijerph182111375), 2021-10-29
Supplement: s1 [file s1]

# Diet quality and incident non-communicable disease in the 1946–51 cohort of the Australian Longitudinal Study on Women's Health

Supplementary file

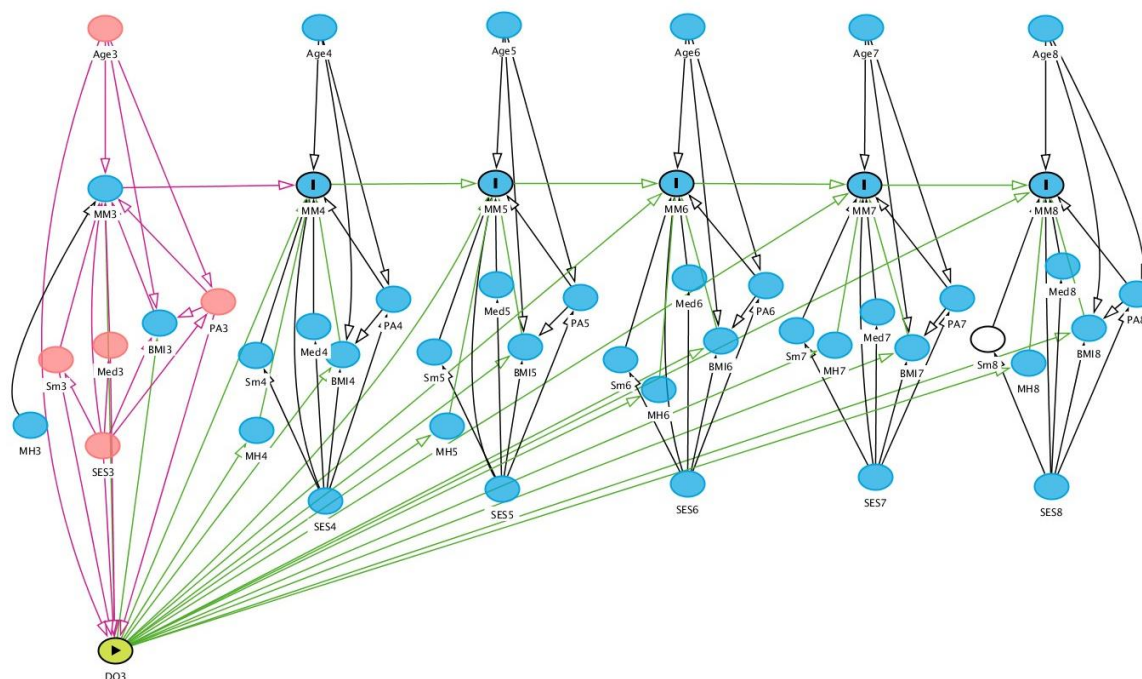

Figure S1. A Directed Acyclic Graph (DAG) used to identify potential confounders for non-communicable disease multimorbidity

The symbols in DAG indicate variables at each survey (from survey 3 to 8); BMI: body mass index; DQ: diet quality (measured using Healthy Eating Index for Australian Adults-2013, Mediterranean Diet Score, Alternative Healthy Eating Index-2010); Med: prescribed and over-the counter medicines taking; MH: history of mental health (depression and/or anxiety in previous surveys); MM: non-communicable disease multimorbidity; PA: physical activity; SES: socioeconomic status (marital status, residence, education, occupation and ability to manage income); Sm-smoking status

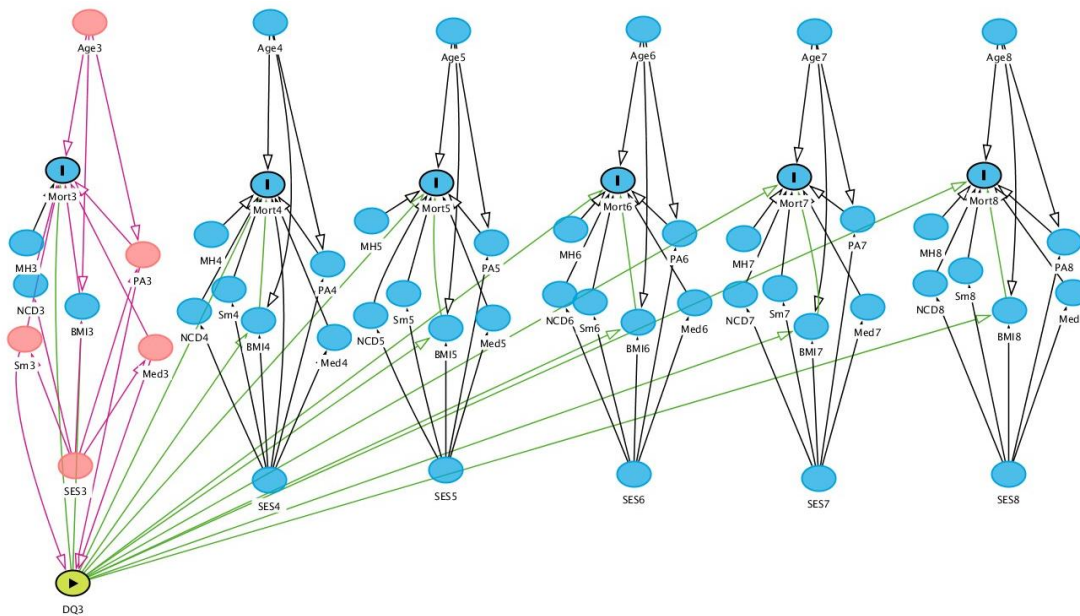

Figure S2. A Directed Acyclic Graph (DAG) used to identify potential confounders for all-cause mortality

The symbols in DAG indicate variables at each survey (from survey 3 to 8); BMI: body mass index; DQ: diet quality (measured using Healthy Eating Index for Australian Adults-2013, Mediterranean Diet Score, Alternative Healthy Eating Index-2010); Med: prescribed and over-the counter medicines taking; MH: history of mental health (depression and/ or anxiety in previous surveys); NCD: non-communicable disease; PA: physical activity; SES: socioeconomic status (residence, education, occupation and ability to manage income); Sm-smoking status

Supplementary Table S1. Respondents in each survey, from survey 4 to survey 8, based on our sample

|                    | Survey 4     | Survey 5     | Survey 6     | Survey 7     | Survey 8     |
|--------------------|--------------|--------------|--------------|--------------|--------------|
| Year               | 2004         | 2007         | 2010         | 2013         | 2016         |
| Age (in years)     | 53–58        | 56–61        | 59–64        | 62–67        | 65–70        |
| Mean age           | 55.42 (1.44) | 58.43 (1.44) | 61.46 (1.45) | 64.71 (1.45) | 67.69 (1.45) |
| Deceased*          | 16           | 48           | 76           | 125          | 180          |
| Loss to follow up* | 468          | 536          | 727          | 971          | 1144         |
| Respondents        | 4866         | 4766         | 4547         | 4254         | 4026         |

\* Numbers are in cumulative.

Supplementary Table S2. Criteria for optimal scoring for three diet quality indices used in the ALSWH study

| Index component                                                                                    | Diet quality index                                                                                                                         |                                |                                                |
|----------------------------------------------------------------------------------------------------|--------------------------------------------------------------------------------------------------------------------------------------------|--------------------------------|------------------------------------------------|
|                                                                                                    | HEIFA-2013                                                                                                                                 | MDS                            | AHEI-2010                                      |
| Extra foods per day                                                                                | Male: < 3 serves<br>Female: < 2.5 serves                                                                                                   |                                |                                                |
| Vegetables per day                                                                                 | Include legume<br>M: ≥ 6 serves<br>F: ≥ 5 serves<br>Variety of vegetables:<br>green, orange,<br>cruciferous, tuber, or bulb<br>and legumes | ≥ median (sex-specific)        | ≥ 5 serves                                     |
| Fruits per day                                                                                     | ≥ 2 serves<br>Variety of fruits                                                                                                            | ≥ median (sex-specific)        | ≥ 4 serves                                     |
| Cereals per day                                                                                    | M: ≥ 6 serves<br>F: ≥ 6 serves<br>Whole grains: 50% of<br>total cereals                                                                    | ≥ median (sex-specific)        | M: 90 g<br>F: 75 g                             |
| Legume per day                                                                                     |                                                                                                                                            | ≥ median (sex-specific)        | Legume and nuts: ≥ 1<br>serve                  |
| Fish and seafood per day                                                                           |                                                                                                                                            | ≥ median (sex-specific)        |                                                |
| Total protein foods per<br>day (seafood and plant<br>proteins, lean meat and<br>meat alternatives) | M: ≥ 3 serves<br>F: ≥ 2.5 serves                                                                                                           |                                |                                                |
| Meat and meat products<br>per day                                                                  |                                                                                                                                            | < median (sex-specific)        | Red and processed meat:<br>0 serve             |
| Dairy foods/ alternatives<br>per day                                                               | M: ≥ 2.5 serves<br>F: ≥ 2.5 serves                                                                                                         | < median (sex-specific)        |                                                |
| Saturated fat (% energy<br>intake)<br>Fatty acids (PUFA and<br>MUFA)                               | <10<br>M: 4 serves<br>F: 2 serves                                                                                                          |                                |                                                |
| Lipid ratios                                                                                       |                                                                                                                                            | ≥ median (sex-specific)        |                                                |
| Trans-fat (% of energy)                                                                            |                                                                                                                                            |                                | ≤ 0.5                                          |
| Long-chain (n-3) fats<br>(EPA+DHA) per day                                                         |                                                                                                                                            |                                | 250 mg                                         |
| PUFA (% of energy)                                                                                 |                                                                                                                                            |                                | ≥ 10                                           |
| Sodium per day                                                                                     | 0-70 mmol (920–1610<br>mg)                                                                                                                 |                                | Lowest decile                                  |
| Percentage of energy (%<br>E) from sugar <sup>§</sup>                                              | < 15%                                                                                                                                      |                                |                                                |
| Alcohol consumption per<br>day                                                                     | < 2.0 standard drinks                                                                                                                      | Male: 10–50 g<br>Female: 5–25g | Male: 0.5–2.0 drinks<br>Female: 0.5–1.5 drinks |
| Sugar-sweetened<br>beverages and fruit juice<br>per day                                            |                                                                                                                                            |                                | 0 serve                                        |
| Fluids: proportion of<br>water consumed relative<br>to total beverages <sup>‡</sup>                | ≥ 50%                                                                                                                                      |                                |                                                |

\*Intermediate amount scored proportionately. AHEI-2010: Alternative Healthy Eating Index-2010, HEIFA-2013: Healthy Eating Index for Australian Adult-2013, MDS: Mediterranean Diet Score

Supplementary Table S3. Cumulative incidence of NCDs, multimorbidity and mortality from Survey 4 to Survey 8 (N=5350)

| NCDs                                  | S4          | S5          | S6          | S7           | S8           |
|---------------------------------------|-------------|-------------|-------------|--------------|--------------|
|                                       | n (%)       | n (%)       | n (%)       | n (%)        | n (%)        |
| <b>Diabetes mellitus</b>              |             |             |             |              |              |
| DM*                                   | 42 (0.79)   | 106 (1.98)  | 143 (2.67)  | 167 (3.12)   | 219 (4.09)   |
| DM <sup>a</sup>                       | 42 (0.79)   | 119 (2.22)  | 206 (3.85)  | 281 (5.25)   | 375 (7.01)   |
| <b>Coronary heart disease</b>         |             |             |             |              |              |
| CHD*                                  | 58 (1.08)   | 98 (1.83)   | 110 (2.06)  | 156 (2.92)   | 171 (3.20)   |
| CHD <sup>a</sup>                      | 58 (1.08)   | 136 (2.54)  | 214 (4.00)  | 320 (5.98)   | 409 (7.64)   |
| <b>Hypertension</b>                   |             |             |             |              |              |
| HT*                                   | 244 (4.56)  | 538 (10.06) | 686 (12.82) | 826 (15.44)  | 883 (16.50)  |
| HT <sup>a</sup>                       | 244 (4.56)  | 604 (11.29) | 924 (17.27) | 1194 (22.32) | 1419 (26.52) |
| <b>Asthma</b>                         |             |             |             |              |              |
| Asthma*                               | 76 (1.42)   | 115 (2.15)  | 143 (2.67)  | 159 (2.97)   | 165 (3.08)   |
| Asthma <sup>a</sup>                   | 76 (1.42)   | 159 (2.97)  | 243 (4.54)  | 314 (5.87)   | 374 (6.99)   |
| <b>Cancer (excluding skin cancer)</b> |             |             |             |              |              |
| Cancer*                               | 86 (1.61)   | 148 (2.77)  | 150 (2.80)  | 182 (3.40)   | 228 (4.26)   |
| Cancer <sup>a</sup>                   | 86 (1.61)   | 199 (3.72)  | 304 (5.68)  | 417 (7.79)   | 555 (10.37)  |
| <b>Depression and/or anxiety</b>      |             |             |             |              |              |
| Depression and/or anxiety*            | 622 (11.63) | 670 (12.52) | 644 (12.04) | 602 (11.25)  | 559 (10.45)  |
| <b>Multimorbidity</b>                 |             |             |             |              |              |
| Multimorbidity <sup>1</sup>           | 133 (2.49)  | 300 (5.61)  | 473 (8.84)  | 657 (12.28)  | 857 (16.02)  |
| <b>All-cause mortality</b>            |             |             |             |              |              |
| All-cause mortality <sup>b</sup>      | 32          | 28          | 49          | 55           | 31           |

Details about ALSWH surveys are available on the study website (<http://www.alsw.org.au>).

CHD: coronary heart disease; DM: diabetes mellitus; HT: hypertension. Non-communicable diseases (except depression and/or anxiety) were considered as enduring condition. <sup>1</sup> Multimorbidity was calculated by enduring condition of NCDs (except depression and/or anxiety). \*Numbers in these rows were participants who had that disease at the time of data collection; <sup>a</sup>Numbers in these rows were participants who had that disease considered as enduring conditions; <sup>b</sup>Number of deaths in each survey.

Supplementary Table S4. Comparison of socio-demographic and lifestyle characteristics of participants those included and excluded in the study sample (at Survey 1, 1996)

| Characteristics                        | Participants at Survey 1 | Participants at Survey 3                        |                                                       |                                                   | P value <sup>a</sup> |
|----------------------------------------|--------------------------|-------------------------------------------------|-------------------------------------------------------|---------------------------------------------------|----------------------|
|                                        | N=13714<br><br>[n (%)]   | Included at Survey 3<br>(n=5350)<br><br>[n (%)] | NCDs before or at Survey 3<br>(n=5278)<br><br>[n (%)] | Missing FFQ at Survey 3<br>(n=593)<br><br>[n (%)] |                      |
| Marital status                         |                          |                                                 |                                                       |                                                   | 0.001                |
| Never married                          | 445 (3.3)                | 163 (3.1)                                       | 160 (3.1)                                             | 23 (3.9)                                          |                      |
| Married/de facto                       | 11311 (82.9)             | 4564 (85.6)                                     | 4379 (83.3)                                           | 473 (80.7)                                        |                      |
| Separated/divorced/widowed             | 1890 (13.9)              | 605 (11.3)                                      | 716 (13.6)                                            | 90 (15.4)                                         |                      |
| Area of residence                      |                          |                                                 |                                                       |                                                   | 0.014                |
| Urban                                  | 4999 (36.5)              | 1963 (36.7)                                     | 1793 (34.0)                                           | 205 (34.6)                                        |                      |
| Inner regional                         | 5214 (38.0)              | 2048 (38.3)                                     | 2113 (40.0)                                           | 216 (36.4)                                        |                      |
| Outer regional/ rural                  | 3498 (25.5)              | 1338 (25.0)                                     | 1372 (26.0)                                           | 172 (29.0)                                        |                      |
| Education                              |                          |                                                 |                                                       |                                                   | <0.001               |
| No formal education                    | 2482 (18.3)              | 780 (14.7)                                      | 927 (17.7)                                            | 151 (26.0)                                        |                      |
| Certificate (intermediate/high school) | 6603 (48.6)              | 2588 (48.7)                                     | 2549 (48.7)                                           | 275 (47.3)                                        |                      |
| Certificate (apprenticeship/ diploma)  | 2599 (19.1)              | 1098 (20.7)                                     | 1026 (19.6)                                           | 95 (16.4)                                         |                      |
| University/ higher degree              | 1892 (14.0)              | 850 (16.0)                                      | 733 (14.0)                                            | 60 (10.3)                                         |                      |
| Occupation                             |                          |                                                 |                                                       |                                                   | <0.001               |
| No paid job                            | 4615 (34.1)              | 1559 (29.4)                                     | 1848 (35.4)                                           | 234 (40.3)                                        |                      |
| Paid job                               | 8926 (65.9)              | 3746 (70.6)                                     | 3367 (64.6)                                           | 347 (59.7)                                        |                      |
| Ability to manage income               |                          |                                                 |                                                       |                                                   | <0.001               |
| Easy/ not bad                          | 7677 (56.3)              | 3356 (63.0)                                     | 2808 (53.5)                                           | 319 (54.6)                                        |                      |
| Sometimes/ always difficult            | 5951 (43.7)              | 1973 (37.0)                                     | 2443 (46.5)                                           | 265 (45.4)                                        |                      |
| Smoking status                         |                          |                                                 |                                                       |                                                   | 0.67                 |
| Never smoked                           | 7049 (53.1)              | 2849 (54.8)                                     | 2772 (54.0)                                           | 319 (56.6)                                        |                      |
| History of smoking                     | 3776 (28.5)              | 1488 (28.6)                                     | 1513 (29.5)                                           | 151 (26.8)                                        |                      |
| Currently smoke                        | 2443 (18.4)              | 864 (16.6)                                      | 851 (16.5)                                            | 94 (16.6)                                         |                      |
| Physical activity                      |                          |                                                 |                                                       |                                                   | <0.001               |
| Nil/ sedentary                         | 2009 (17.9)              | 739 (15.3)                                      | 905 (19.1)                                            | 100 (20.2)                                        |                      |
| Low                                    | 3225 (28.7)              | 1345 (27.7)                                     | 1372 (29.0)                                           | 157 (31.8)                                        |                      |
| Moderate                               | 2574 (22.9)              | 1176 (24.2)                                     | 1073 (22.7)                                           | 98 (19.8)                                         |                      |
| High                                   | 3418 (30.5)              | 1592 (32.8)                                     | 1380 (29.2)                                           | 139 (28.2)                                        |                      |
| Self-rated health                      |                          |                                                 |                                                       |                                                   | <0.001               |
| Excellent                              | 1759 (13.0)              | 980 (18.4)                                      | 479 (9.2)                                             | 75 (12.8)                                         |                      |
| Very good                              | 4857 (35.8)              | 2179 (41.1)                                     | 1761 (33.7)                                           | 188 (32.1)                                        |                      |
| Good                                   | 5378 (39.7)              | 1833 (34.6)                                     | 2282 (43.6)                                           | 231 (39.5)                                        |                      |
| Fair/ poor                             | 1560 (11.5)              | 311 (5.9)                                       | 705 (13.5)                                            | 91 (15.6)                                         |                      |
| Taking prescribed medicine             |                          |                                                 |                                                       |                                                   | <0.001               |
| Not taken                              | 6366 (47.0)              | 3110 (59.0)                                     | 1887 (36.1)                                           | 264 (45.5)                                        |                      |
| Taken                                  | 7179 (53.0)              | 2165 (41.0)                                     | 3338 (63.9)                                           | 316 (54.5)                                        |                      |
| Taking over-the-counter medicine       |                          |                                                 |                                                       |                                                   | <0.001               |
| Not taken                              | 5331 (39.4)              | 2022 (38.4)                                     | 1935 (37.1)                                           | 263 (45.4)                                        |                      |
| Taken                                  | 8199 (60.6)              | 3248 (61.6)                                     | 3286 (62.9)                                           | 316 (54.6)                                        |                      |

Due to missing data, the sum for each characteristic may not equal n. <sup>a</sup>P values from chi-squared tests.

Supplementary Table S5. Associations between diet quality indices and risk of common NCDs (including multimorbidity, Survey 4 to Survey 7) among women who remained at Survey 8 (N=4026)

|                                      | S4 (n=3439) <sup>b</sup> | S5 (n=3485) <sup>b</sup> | S6 (n=3513) <sup>b</sup> | S7 (n=3632) <sup>b</sup> |
|--------------------------------------|--------------------------|--------------------------|--------------------------|--------------------------|
| Number of missing values             | 587                      | 541                      | 513                      | 394                      |
| Diet quality index                   | OR (95% CI)              | OR (95% CI)              | OR (95% CI)              | OR (95% CI)              |
| <b>DM</b>                            | <b>n=42</b>              | <b>n=119</b>             | <b>n=206</b>             | <b>n=281</b>             |
| HEIFA-2013 – Univariate              | 0.31 (0.08–1.15)         | 0.66 (0.34–1.29)         | 0.78 (0.48–1.26)         | 0.73 (0.49–1.11)         |
| - Multivariate                       | 0.57 (0.14–2.29)         | 0.78 (0.36–1.68)         | 0.77 (0.45–1.34)         | 0.83 (0.53–1.29)         |
| MDS – Univariate                     | 1.07 (0.27–4.14)         | 0.66 (0.29–1.54)         | 0.88 (0.49–1.57)         | 0.69 (0.41–1.14)         |
| - Multivariate                       | 1.64 (0.31–8.63)         | 0.96 (0.40–2.29)         | 1.14 (0.60–2.15)         | 0.91 (0.52–1.57)         |
| AHEI-2010 – Univariate               | 0.42 (0.11–1.69)         | 0.24 (0.10–0.56)*        | 0.35 (0.20–0.62)*        | 0.35 (0.21–0.56)*        |
| - Multivariate                       | 0.97 (0.22–4.29)         | 0.35 (0.14–0.84)*        | 0.46 (0.25–0.87)*        | 0.44 (0.26–0.75)*        |
| <b>CHD</b>                           | <b>n=58</b>              | <b>n=136</b>             | <b>n=214</b>             | <b>n=320</b>             |
| HEIFA-2013 – Univariate              | 1.11 (0.49–2.49)         | 1.18 (0.65–2.13)         | 0.64 (0.40–1.03)         | 0.91 (0.62–1.34)         |
| - Multivariate                       | 1.11 (0.46–2.67)         | 1.10 (0.59–2.06)         | 0.70 (0.41–1.20)         | 1.23 (0.80–1.87)         |
| MDS – Univariate                     | 0.77 (0.28–2.12)         | 0.48 (0.22–1.02)         | 0.56 (0.32–0.99)*        | 0.74 (0.48–1.15)         |
| - Multivariate                       | 0.59 (0.16–2.09)         | 0.48 (0.21–1.10)         | 0.67 (0.36–1.23)         | 0.97 (0.60–1.55)         |
| AHEI-2010 – Univariate               | 0.85 (0.33–2.14)         | 0.58 (0.31–1.06)         | 0.49 (0.30–0.80)*        | 0.58 (0.39–0.84)*        |
| - Multivariate                       | 1.07 (0.39–2.89)         | 0.59 (0.30–1.16)         | 0.59 (0.34–1.02)         | 0.71 (0.47–1.08)         |
| <b>HT</b>                            | <b>n=244</b>             | <b>n=604</b>             | <b>n=924</b>             | <b>n=1194</b>            |
| HEIFA-2013 – Univariate              | 0.96 (0.61–1.50)         | 0.86 (0.64–1.17)         | 0.83 (0.64–1.07)         | 0.76 (0.60–0.95)*        |
| - Multivariate                       | 1.11 (0.68–1.81)         | 0.88 (0.63–1.24)         | 0.85 (0.64–1.13)         | 0.75 (0.58–0.97)*        |
| MDS – Univariate                     | 0.98 (0.60–1.58)         | 0.93 (0.67–1.29)         | 0.71 (0.54–0.93)*        | 0.68 (0.53–0.87)*        |
| - Multivariate                       | 1.13 (0.67–1.91)         | 1.19 (0.83–1.70)         | 0.74 (0.54–1.00)         | 0.75 (0.57–1.00)         |
| AHEI-2010 – Univariate               | 0.54 (0.34–0.86)*        | 0.61 (0.45–0.83)*        | 0.66 (0.51–0.85)*        | 0.68 (0.54–0.85)*        |
| - Multivariate                       | 0.65 (0.39–1.07)         | 0.71 (0.50–1.00)         | 0.83 (0.62–1.10)         | 0.78 (0.60–1.01)         |
| <b>Asthma</b>                        | <b>n=76</b>              | <b>n=159</b>             | <b>n=243</b>             | <b>n=314</b>             |
| HEIFA-2013 – Univariate              | 0.66 (0.29–1.51)         | 0.97 (0.57–1.66)         | 0.96 (0.62–1.49)         | 0.90 (0.61–1.32)         |
| - Multivariate                       | 0.84 (0.34–2.10)         | 0.95 (0.53–1.70)         | 0.99 (0.61–1.62)         | 1.08 (0.71–1.65)         |
| MDS – Univariate                     | 0.65 (0.24–1.75)         | 1.21 (0.66–2.22)         | 0.90 (0.54–1.49)         | 0.80 (0.51–1.25)         |
| - Multivariate                       | 0.84 (0.30–2.34)         | 1.43 (0.75–2.74)         | 1.08 (0.63–1.84)         | 0.94 (0.58–1.52)         |
| AHEI-2010 – Univariate               | 0.50 (0.22–1.16)         | 0.57 (0.32–1.02)         | 0.56 (0.35–0.89)         | 0.53 (0.35–0.79)*        |
| - Multivariate                       | 0.75 (0.29–1.91)         | 0.66 (0.36–1.23)         | 0.62 (0.38–1.01)         | 0.60 (0.39–0.94)*        |
| <b>Cancer (excludes skin cancer)</b> | <b>n=86</b>              | <b>n=199</b>             | <b>n=304</b>             | <b>n=417</b>             |
| HEIFA-2013 – Univariate              | 0.87 (0.41–1.86)         | 1.35 (0.83–2.22)         | 1.22 (0.82–1.83)         | 1.20 (0.84–1.71)         |
| - Multivariate                       | 0.96 (0.42–2.19)         | 1.62 (0.92–2.84)         | 1.24 (0.79–1.96)         | 1.31 (0.89–1.90)         |
| MDS – Univariate                     | 0.54 (0.20–1.42)         | 0.79 (0.44–1.40)         | 0.88 (0.56–1.39)         | 0.98 (0.66–1.44)         |
| - Multivariate                       | 0.45 (0.15–1.33)         | 0.88 (0.48–1.61)         | 1.01 (0.62–1.67)         | 1.08 (0.72–1.63)         |
| AHEI-2010 – Univariate               | 1.71 (0.76–3.82)         | 1.18 (0.69–2.04)         | 1.08 (0.69–1.68)         | 1.19 (0.81–1.74)         |
| - Multivariate                       | 1.49 (0.64–3.43)         | 1.36 (0.75–2.45)         | 1.06 (0.65–1.74)         | 1.20 (0.80–1.81)         |
| <b>Depression/ anxiety</b>           | <b>n=622</b>             | <b>n=670</b>             | <b>n=644</b>             | <b>n=602</b>             |
| HEIFA-2013 – Univariate              | 0.82 (0.60–1.12)         | 0.90 (0.67–1.20)         | 0.79 (0.59–1.05)         | 0.81 (0.61–1.09)         |
| - Multivariate <sup>a</sup>          | 0.99 (0.68–1.44)         | 1.03 (0.73–1.47)         | 0.70 (0.49–1.00)         | 0.79 (0.56–1.11)         |
| MDS – Univariate                     | 1.02 (0.74–1.39)         | 1.11 (0.83–1.48)         | 1.01 (0.75–1.36)         | 0.74 (0.54–1.01)         |
| - Multivariate <sup>a</sup>          | 1.14 (0.77–1.67)         | 1.11 (0.77–1.59)         | 0.90 (0.63–1.30)         | 0.74 (0.51–1.08)         |
| AHEI-2010 – Univariate               | 1.00 (0.73–1.37)         | 1.09 (0.81–1.46)         | 1.06 (0.77–1.45)         | 1.07 (0.79–1.44)         |
| - Multivariate <sup>a</sup>          | 1.16 (0.79–1.71)         | 1.10 (0.77–1.59)         | 1.05 (0.71–1.53)         | 1.11 (0.77–1.58)         |
| <b>Multimorbidity</b>                | <b>n=133</b>             | <b>n=300</b>             | <b>n=473</b>             | <b>n=657</b>             |
| HEIFA-2013 – Univariate              | 0.69 (0.39–1.23)         | 0.74 (0.49–1.13)         | 0.74 (0.54–1.03)         | 0.70 (0.53–0.93)*        |
| - Multivariate <sup>a</sup>          | 0.93 (0.49–1.78)         | 0.75 (0.47–1.19)         | 0.74 (0.51–1.08)         | 0.83 (0.61–1.15)         |
| MDS – Univariate                     | 1.20 (0.61–2.35)         | 0.90 (0.56–1.45)         | 0.73 (0.50–1.07)         | 0.65 (0.47–0.91)*        |
| - Multivariate <sup>a</sup>          | 1.25 (0.57–2.73)         | 1.09 (0.64–1.86)         | 0.82 (0.54–1.26)         | 0.79 (0.55–1.14)         |
| AHEI-2010 – Univariate               | 0.84 (0.45–1.58)         | 0.69 (0.45–1.07)         | 0.77 (0.55–1.09)         | 0.57 (0.43–0.76)*        |
| - Multivariate <sup>a</sup>          | 1.09 (0.54–2.19)         | 0.78 (0.48–1.26)         | 0.94 (0.64–1.38)         | 0.66 (0.48–0.92)*        |

CHD: coronary heart disease; CI: confidence interval; DM: diabetes mellitus; HT: hypertension; OR: odds ratio. OR (95% CI) described in the table is the odds of having NCDs (each disease and multimorbidity) compared to quintile 5 to quintile 1 of each diet quality index (HEIFA-2013, MDS and AHEI-2010). Adjusted covariates were age; socioeconomic status (marital status, residence, education, occupation and ability to manage income); lifestyle variables (smoking status, physical activity, taking prescribed and over-the-counter medicine) for all NCD outcomes. <sup>a</sup>History of depression and/or anxiety at any previous survey(s) was included as a covariate. <sup>b</sup> Number in parenthesis is number of women in each survey for multivariate analysis; Number in bold and italic are cumulative number of NCD cases (except depression/ anxiety) in each survey; \*Statistically significant (p<0.05).

Supplementary Table S6. Associations between diet quality indices and risk of all-cause mortality among 1946-51 ALSWH cohort women who ever had NCD between Survey 3 and Survey 8 (n=3032)

| Diet quality index                     | OR (95% CI)              | OR (95% CI)              | OR (95% CI)               | OR (95% CI)               | OR (95% CI)               |
|----------------------------------------|--------------------------|--------------------------|---------------------------|---------------------------|---------------------------|
| <i>Number of deaths at each survey</i> | <i>n=32</i>              | <i>n=28</i>              | <i>n=49</i>               | <i>n=55</i>               | <i>n=31</i>               |
| <b>HEIFA-2013</b>                      |                          |                          |                           |                           |                           |
|                                        | S4 (n=3029) <sup>c</sup> | S5 (n=3020) <sup>c</sup> | S6 (n=3016) <sup>c</sup>  | S7 (n= 3003) <sup>c</sup> | S8 (n=2995) <sup>c</sup>  |
| Univariate                             | 0.83 (0.20–3.48)         | 0.49 (0.14–1.71)         | 0.71 (0.30–1.67)          | 0.63 (0.28–1.39)          | 0.37 (0.13–1.06)          |
|                                        | S4 (n=1097) <sup>d</sup> | S5 (n=1251) <sup>d</sup> | S6 (n= 1809) <sup>d</sup> | S7 (n= 2375) <sup>d</sup> | S8 (n= 2354) <sup>d</sup> |
| Multivariate                           | 1.04 (0.17–6.34)         | 0.23 (0.04–1.28)         | 0.48 (0.15–1.53)          | 0.78 (0.30–2.00)          | 0.52 (0.15–1.82)          |
| <b>MDS</b>                             |                          |                          |                           |                           |                           |
|                                        | S4 (n=3029) <sup>c</sup> | S5 (n=3020) <sup>c</sup> | S6 (n=3016) <sup>c</sup>  | S7 (n= 3003) <sup>c</sup> | S8 (n=2995) <sup>c</sup>  |
| Univariate                             | 0.42 (0.04–4.02)         | 0.62 (0.19–2.08)         | 0.33 (0.11–1.00)          | 0.79 (0.30–2.04)          | 0.44 (0.16–1.24)          |
|                                        | S4 (n=1365) <sup>d</sup> | S5 (n=1251) <sup>d</sup> | S6 (n= 1454) <sup>d</sup> | S7 (n= 2375) <sup>d</sup> | S8 (n= 2354) <sup>d</sup> |
| Multivariate                           | 0.91 (0.08–11.04)        | 0.23 (0.03–2.10)         | 0.29 (0.08–1.04)          | 0.79 (0.25–2.51)          | 0.61 (0.18–2.03)          |
| <b>AHEI-2010</b>                       |                          |                          |                           |                           |                           |
|                                        | S4 (n=3029) <sup>c</sup> | S5 (n=3020) <sup>c</sup> | S6 (n=3016) <sup>c</sup>  | S7 (n= 3003) <sup>c</sup> | S8 (n=2995) <sup>c</sup>  |
| Univariate                             | 0.33 (0.05–1.96)         | 0.82 (0.19–3.43)         | 0.54 (0.23–1.27)          | 1.39 (0.55–3.55)          | 0.44 (0.17–1.14)          |
|                                        | S4 (n=1365) <sup>d</sup> | S5 (n=1251) <sup>d</sup> | S6 (n= 1809) <sup>d</sup> | S7 (n= 2375) <sup>d</sup> | S8 (n= 2354) <sup>d</sup> |
| Multivariate                           | 1.21 (0.10–14.14)        | 0.20 (0.02–2.07)         | 0.39 (0.12–1.24)          | 2.36 (0.65–8.58)          | 1.04 (0.33–3.27)          |

OR: odds ratio. OR (95% CI) described in the table is the odds of mortality compared to the highest category to the lowest category of diet quality indices (HEIFA-2013, MDS and AHEI-2010). Quintile 4 and 5 were collapsed due to their small sample sizes. Adjusted covariates at each survey were age; socioeconomic status (residence, education, occupation and ability to manage income); lifestyle variables (smoking status, physical activity, taking prescribed and over-the-counter medicine), and history of depression and/or anxiety at any previous survey (s). <sup>c</sup> Number in parenthesis is number of women who ever had any NCD from Survey 3 to Survey 8 for univariate analysis; <sup>d</sup> Number in parenthesis is number of women who ever had any NCD from Survey 3 to Survey 8 for multivariate analysis; Number in bold and italic are number of all-cause mortality in each survey.

Supplementary Table S7. Associations between diet quality indices and total deaths across Survey 4 to Survey 8 among 1946-51 ALSWH cohort women (n=5350)

| Diet quality index                                     | OR (95% CI)       |
|--------------------------------------------------------|-------------------|
| <i>Total number of deaths across Survey 4-Survey 8</i> | <i>n=195</i>      |
| <b>HEIFA-2013</b>                                      |                   |
| Univariate                                             | n=5350            |
|                                                        | 0.67 (0.47–0.98)* |
| Multivariate                                           | n=4869            |
|                                                        | 0.80 (0.54–1.20)  |
| <b>MDS</b>                                             |                   |
| Univariate                                             | n=5350            |
|                                                        | 0.54 (0.36–0.81)* |
| Multivariate                                           | n=4869            |
|                                                        | 0.68 (0.44–1.05)  |
| <b>AHEI-2010</b>                                       |                   |
| Univariate                                             | n=5350            |
|                                                        | 0.64 (0.44–0.93)* |
| Multivariate                                           | n=4869            |
|                                                        | 0.77 (0.51–1.17)  |

OR: odds ratio. OR (95% CI) described in the table is the odds of mortality compared to the highest category to the lowest category of diet quality indices (HEIFA-2013, MDS and AHEI-2010). Quintile 4 and 5 were collapsed due to their small sample sizes. Adjusted covariates were age; socioeconomic status (residence, education, occupation and ability to manage income); lifestyle variables (smoking status, physical activity, taking prescribed and over-the-counter medicine), and history of depression and/or anxiety at baseline (Survey 3). \* Statistically significant (p<0.05).
